# Supplementary material for: A role for ColV plasmids in the evolution of pathogenic Escherichia coli ST58
Source: PubMed Central journal article supplement (PMC8813906; doi:10.1038/s41467-022-28342-4), 2022-02-03
Supplement: 41467_2022_28342_MOESM1_ESM.pdf [file 41467_2022_28342_MOESM1_ESM.pdf]

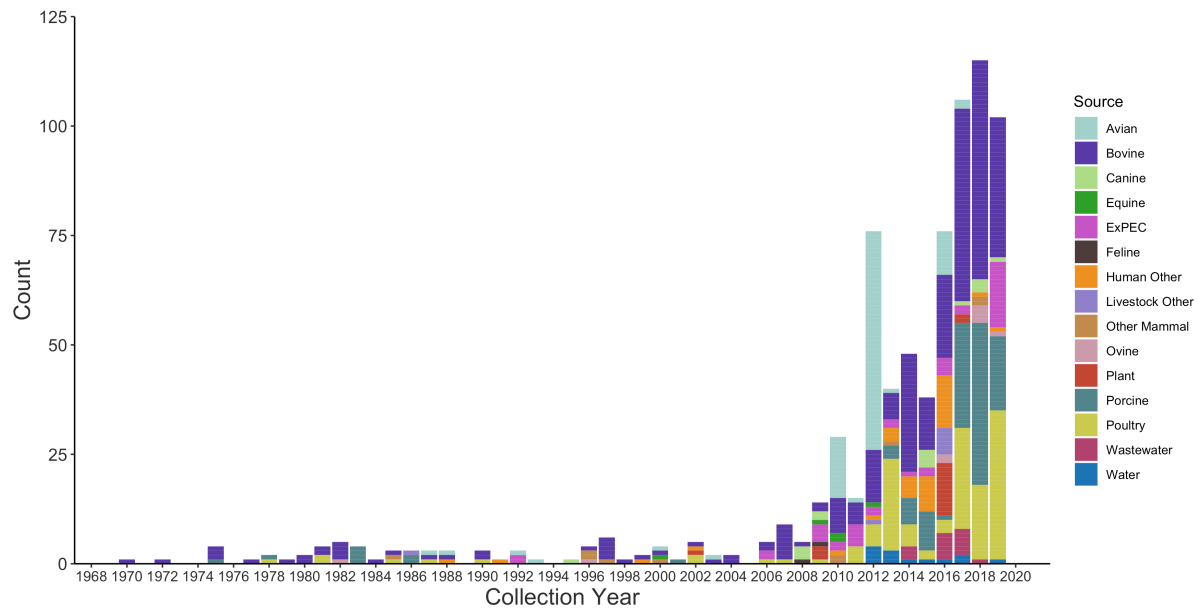

**Figure S1. Temporal distribution of ST58 by source.** Full distribution of sample collection years stratified by source for 752 ST58 strains.

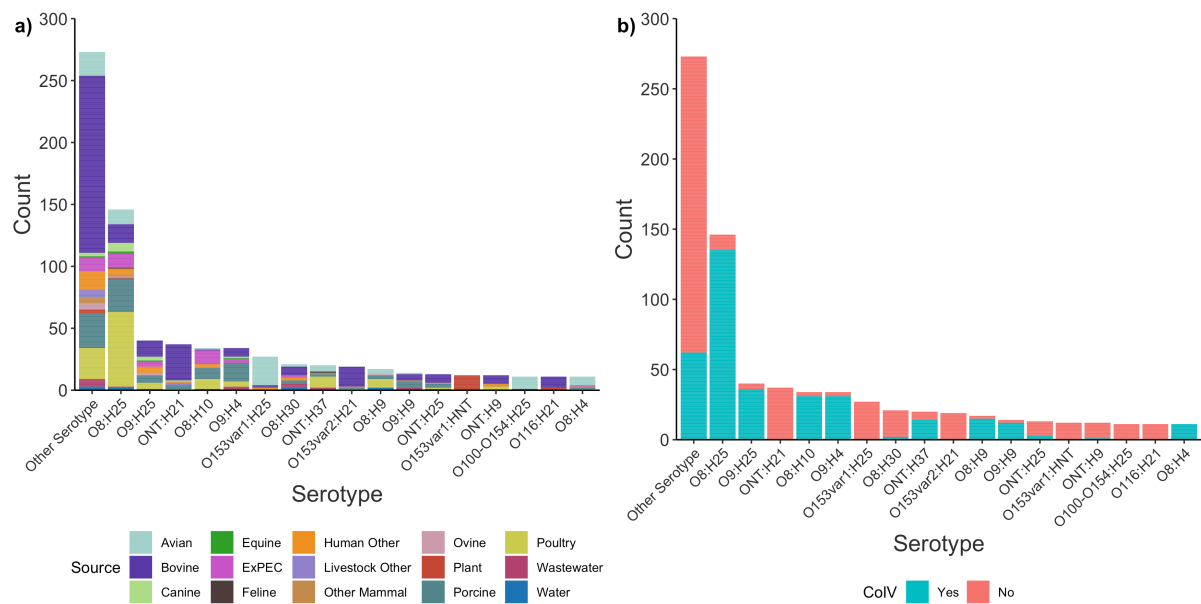

**Figure S2. Relationship between serotypes, sources and ColV carriage.** Distribution of serotypes stratified by a) source and b) ColV carriage.

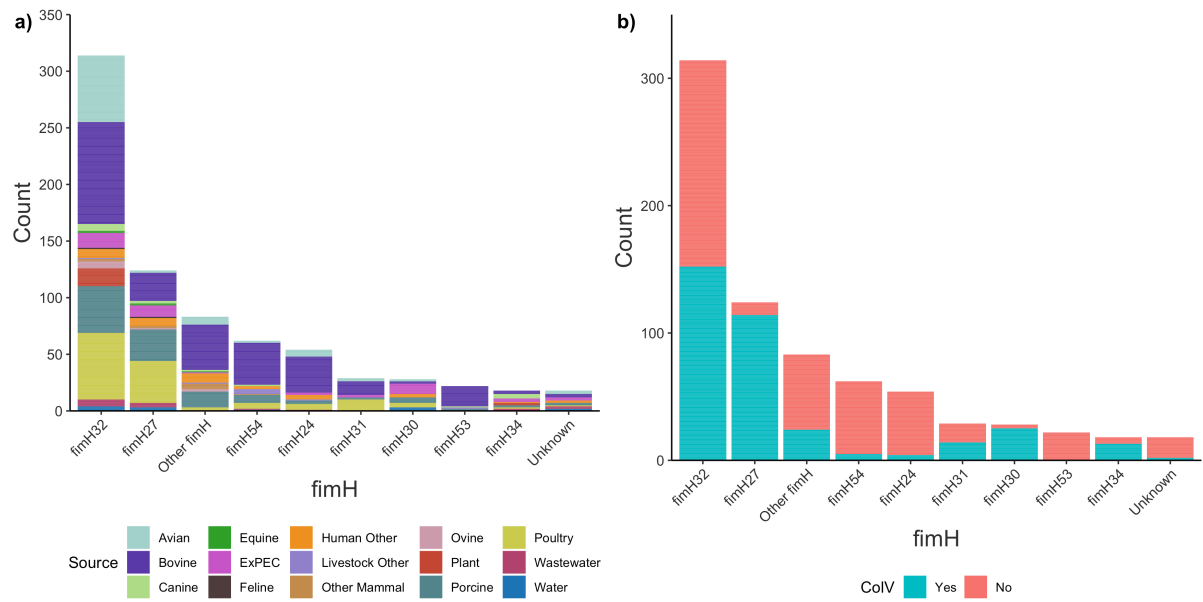

**Figure S3. Relationship between *fimH*, sources and ColV carriage.** Distribution of *fimH* alleles stratified by **a)** source and **b)** ColV carriage.

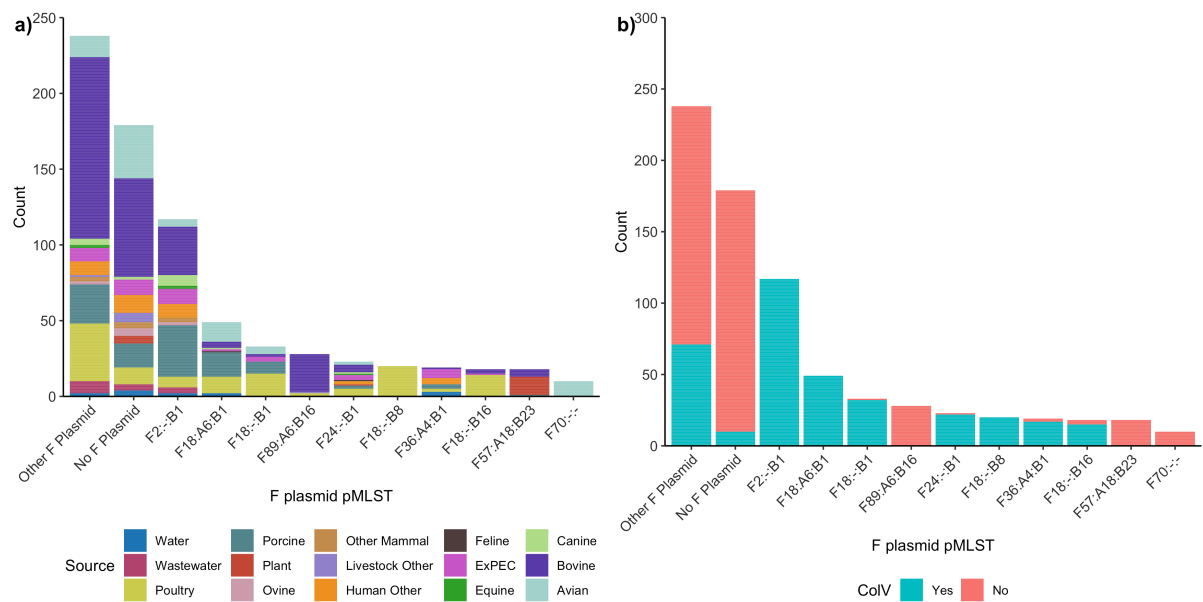

**Figure S4. Relationship between F plasmid RST, sources and ColV carriage.** Distribution of F plasmid replicon sequence types (RST) stratified by **a)** source and **b)** ColV carriage.

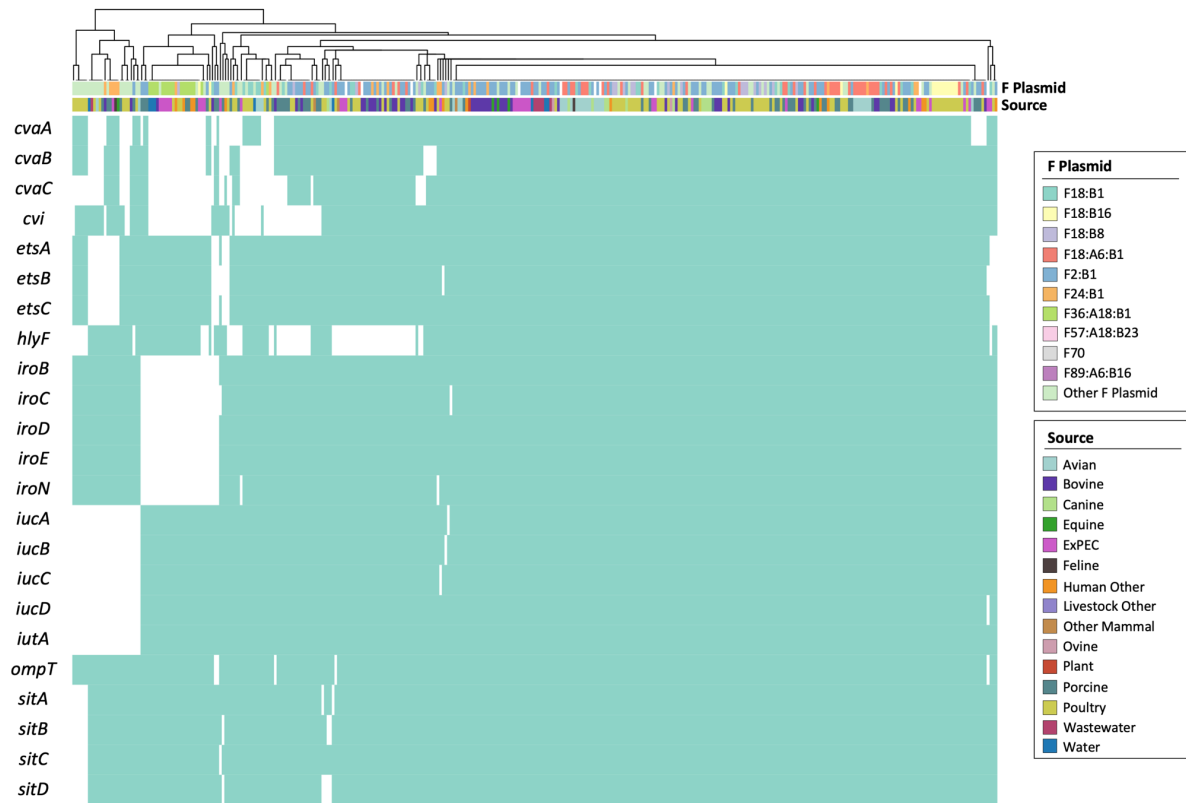

**Figure S5. Marker gene carriage in ColV+ ST58 genomes.** Presence/absence of ColV typing genes (Liu criteria - see Methods) among 353 ColV+ genome sequences. F plasmid replicon sequence type (RST) and isolate source are shown as metadata bands. Data was hierarchically clustered by gene profile similarity in *heatmap* 1.0.12.

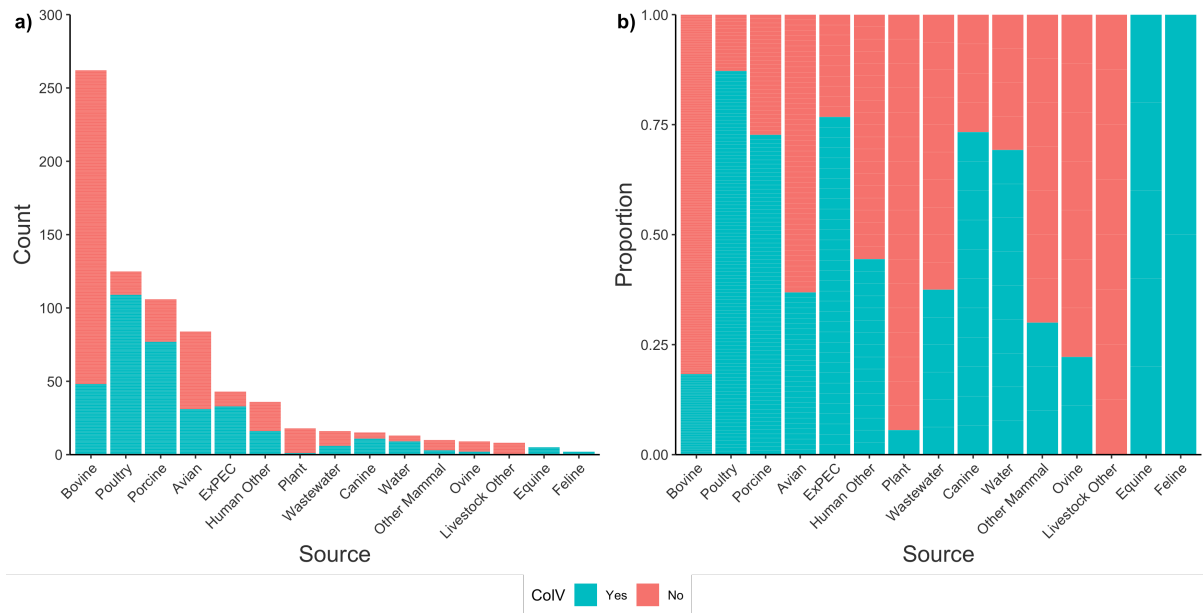

**Figure S6. Relationship between source and CoIV carriage.** Source distribution stratified by **a)** absolute and **b)** proportional CoIV carriage.

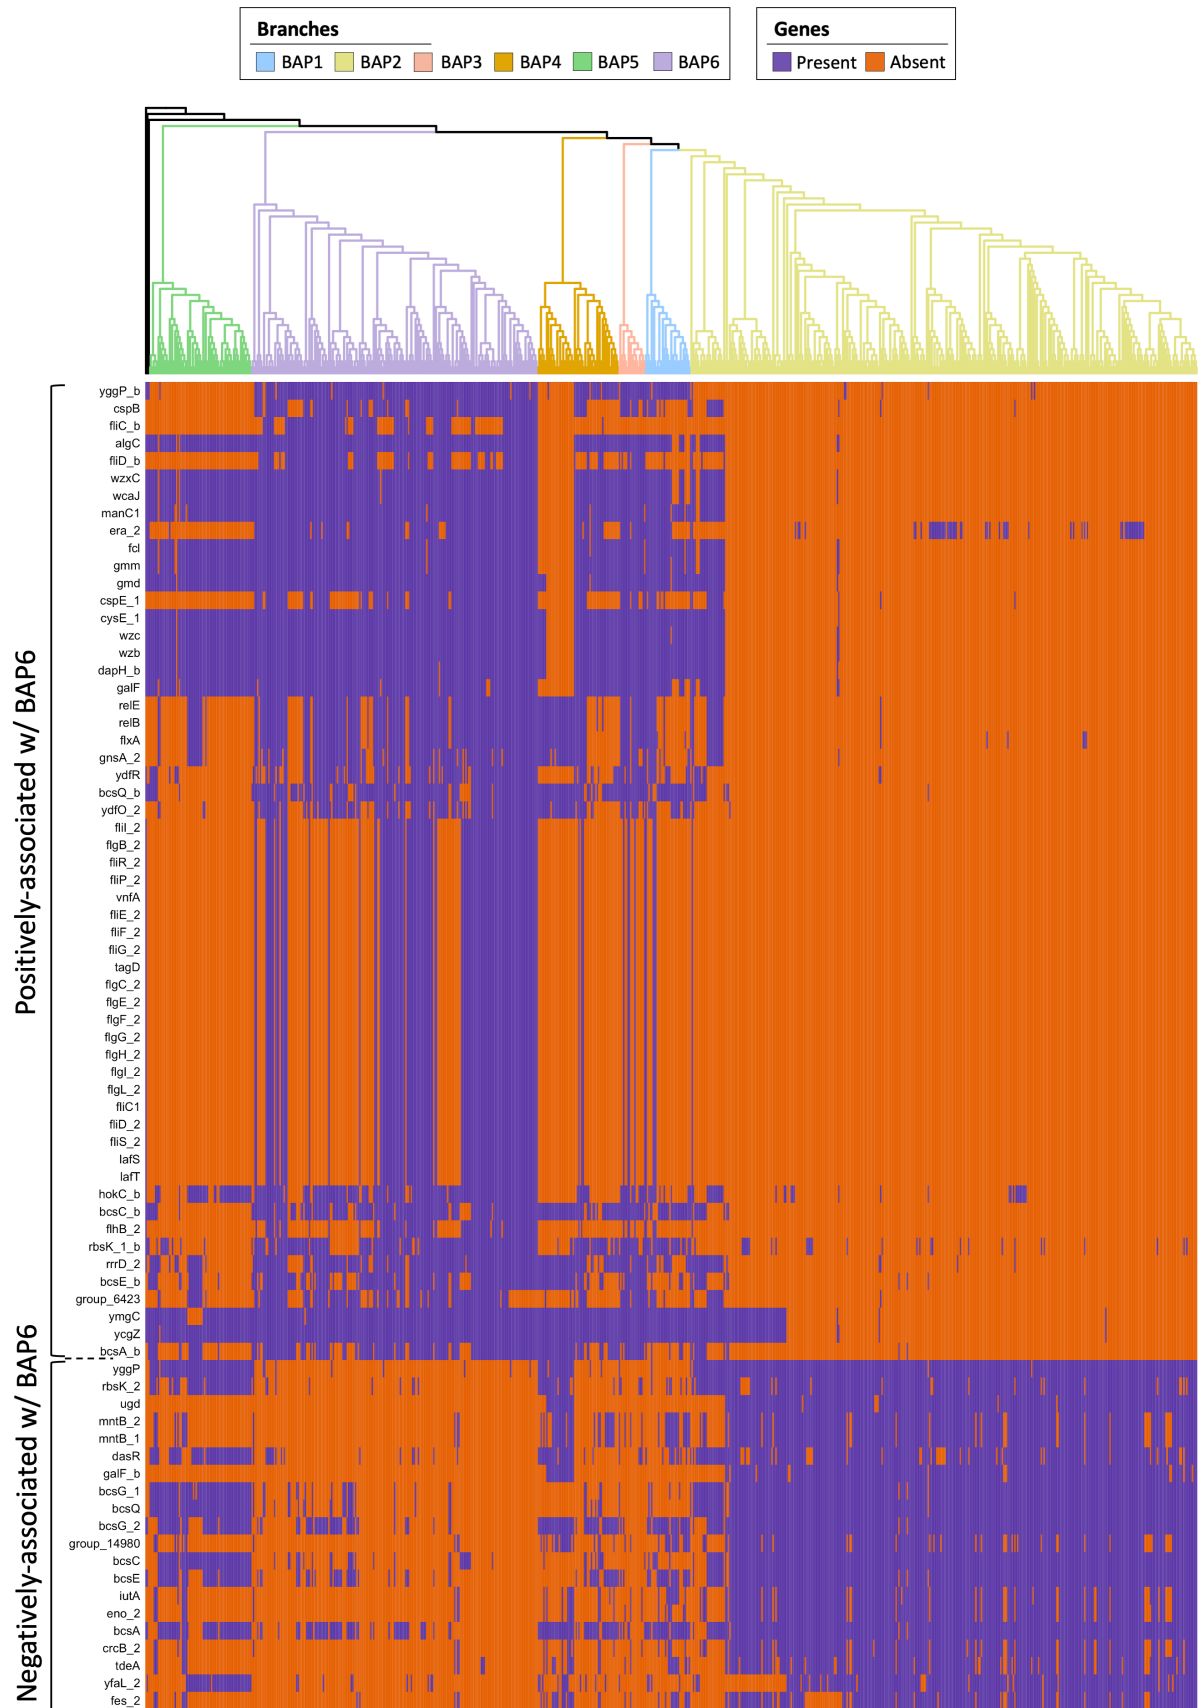

**Figure S7. Genes associated with the BAP6 cluster of ST58.** Presence/absence (purple/orange) of genes positively and negatively associated with the BAP6 cluster mapped to the phylogeny. Tree branches indicate BAP clusters.

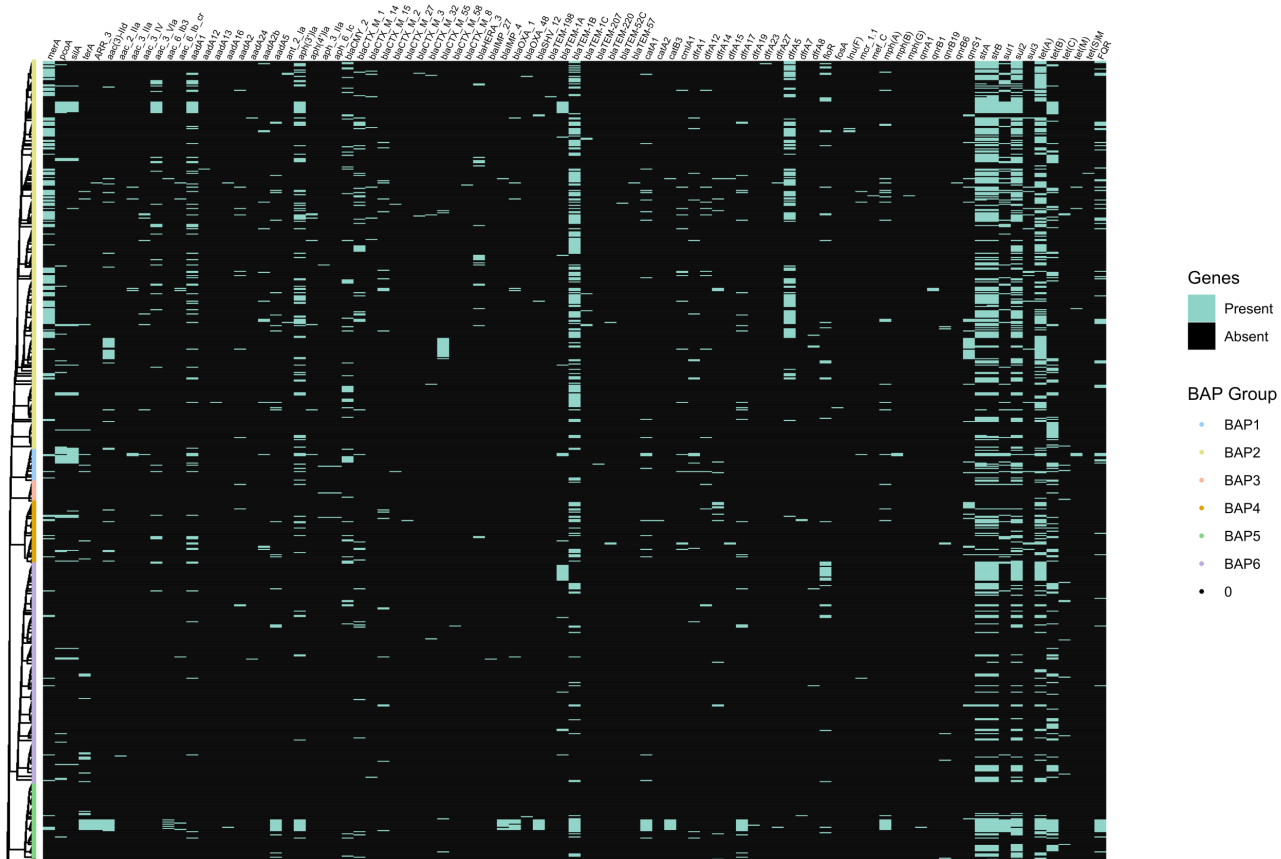

**Figure S8. Antimicrobial resistance gene heatmap.** Presence/absence (green/black) of antimicrobial and heavy metal resistance genes in 752 ST58 genomes.

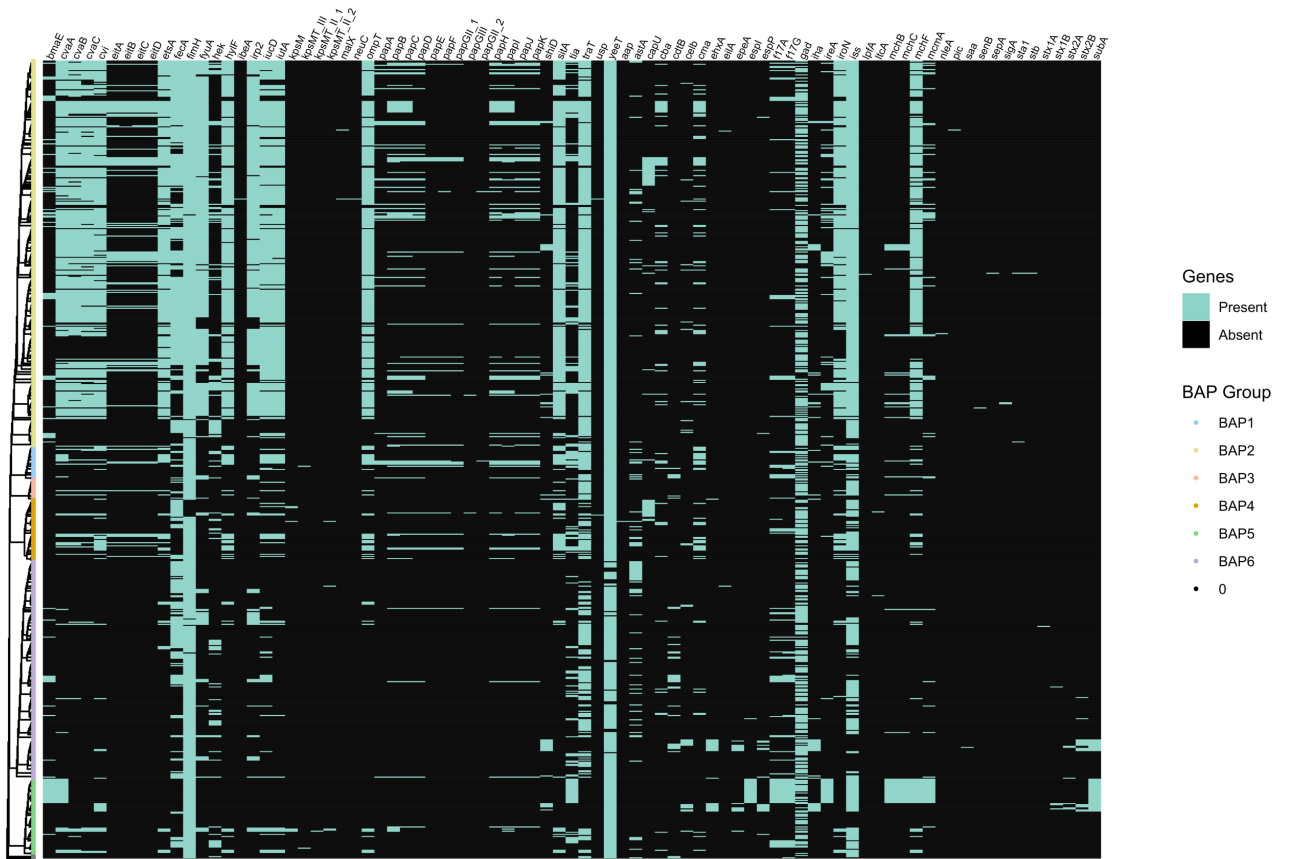

**Figure S9. Virulence-associated gene heatmap.** Presence/absence (green/black) of virulence-associated genes in 752 ST58 genomes.

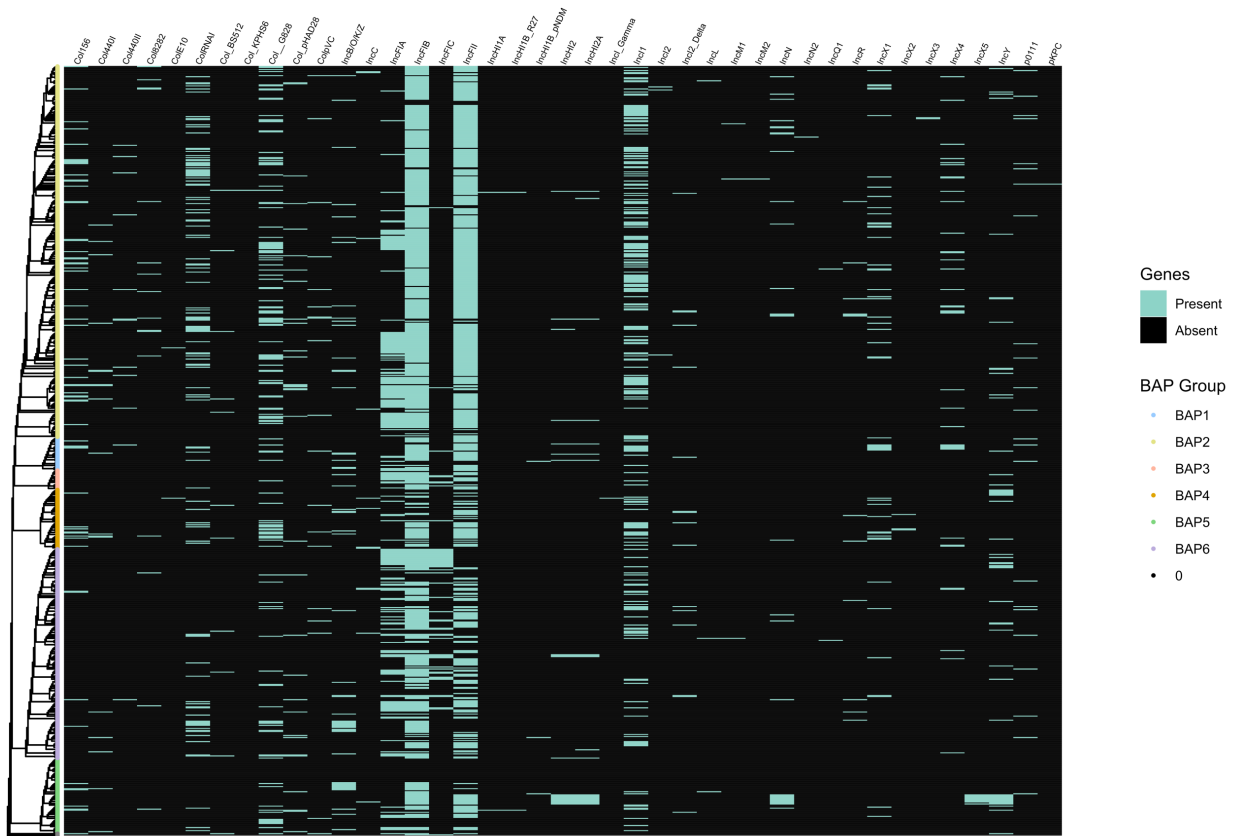

**Figure S10. Plasmid replicon gene heatmap.** Presence/absence (green/black) of plasmid replicon genes in 752 ST58 genomes.



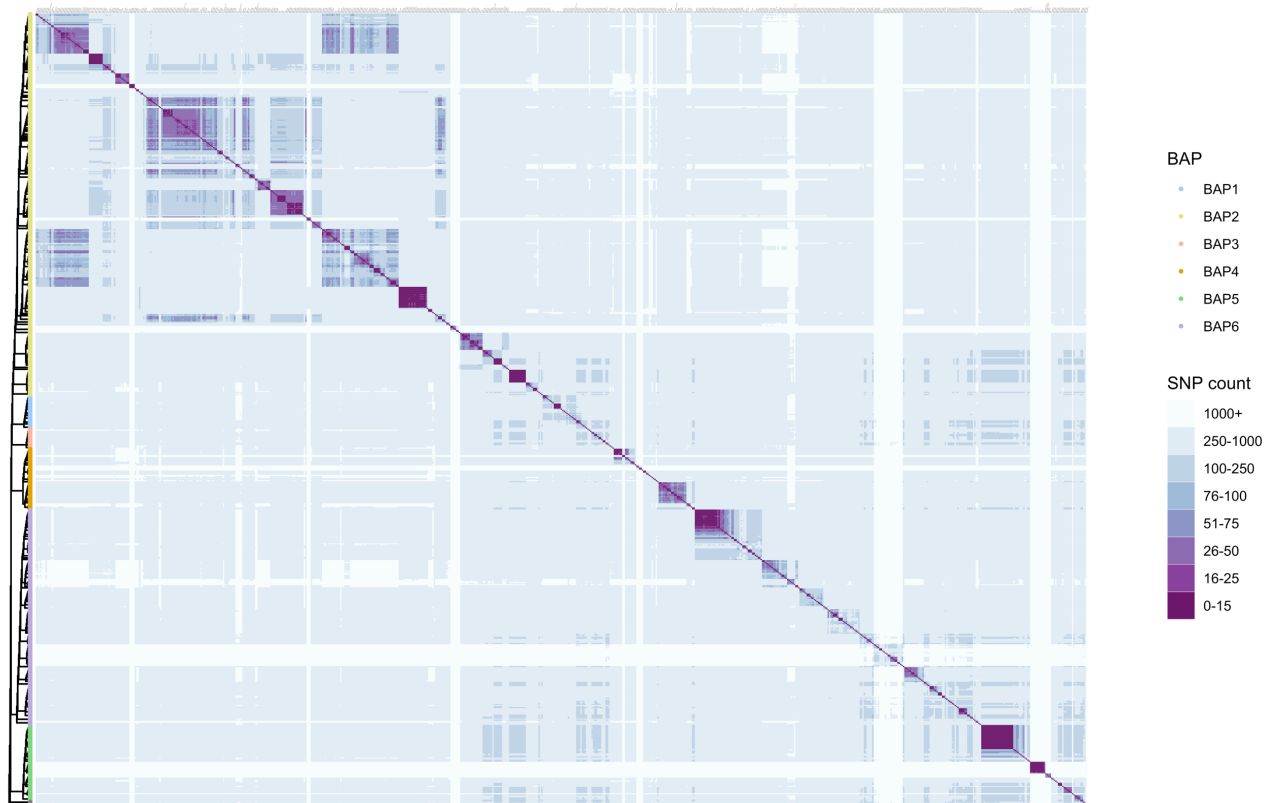

**Figure S11. Pairwise SNP distance heatmap.** Heatmap of pairwise SNP distances between 752 ST58 genomes mapped to the maximum likelihood phylogeny. Tree branches display BAP colours. Darker squares indicate lower SNP distances.
