# Supplementary material for: A role for ColV plasmids in the evolution of pathogenic Escherichia coli ST58
Source: PubMed Central journal article supplement (PMC8813906; doi:10.1038/s41467-022-28342-4), 2022-02-03
Supplement: 41467_2022_28342_MOESM3_ESM.pdf [file 41467_2022_28342_MOESM3_ESM.pdf]

## **Description of Additional Supplementary Files**

File Name: Supplementary Data 1

Description: Metadata, accession numbers and assembly statistics for 752 ST58 genomes used in this study

File Name: Supplementary Data 2

Description: Gene screening data for 752 ST58 genomes used in this study

File Name: Supplementary Data 3

Description: Scoary output of genes identified to be significantly over-or under-represented in BAP clusters

File Name: Supplementary Data 4

Description: Metadata and ColV gene screening data for 34,364 *E. coli* genome assemblies from Enterobase
